# Supplementary material for: Plasma-modified Ti3C2Tx/CdS hybrids with oxygen-containing groups for high-efficiency photocatalytic hydrogen production
Source: Royal Society of Chemistry journal article supplement (doi:10.1039/c9nr07242j), 2019-01-01
Supplement: c9nr07242j1.pdf [file c9nr07242j1.pdf]

**Plasma-modified  $\text{Ti}_3\text{C}_2\text{T}_x/\text{CdS}$  hybrids with oxygen-containing groups for high-efficiency photocatalytic hydrogen production**

**Yali Yang, Dainan Zhang, Qianjun Xiang\***

State Key Laboratory of Electronic Thin Film and Integrated Devices, School of Electronic Science and Engineering, University of Electronic Science and Technology of China, Chengdu 610054, P. R. China, E-mail: [xiangqj@uestc.edu.cn](mailto:xiangqj@uestc.edu.cn);

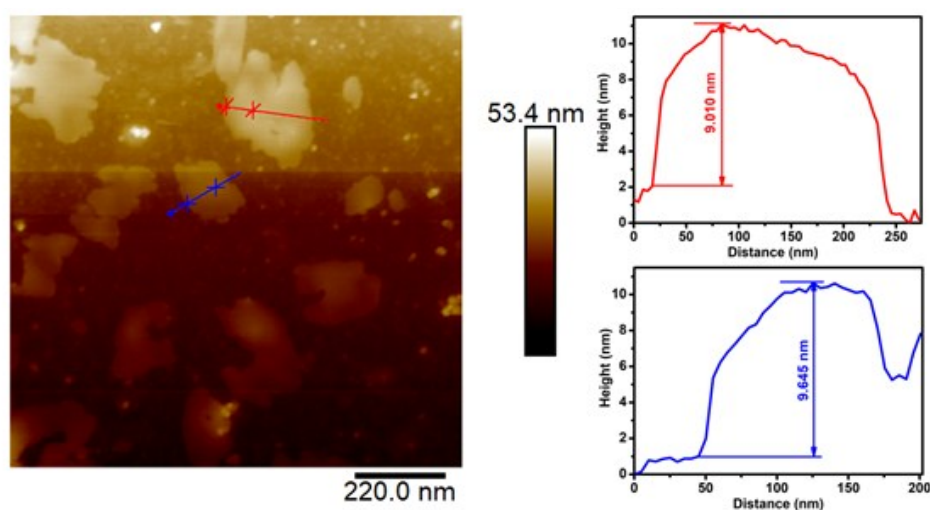

**Fig. S1** Atomic force microscopy (AFM) image and corresponding height profiles along the red and blue lines of NPT.

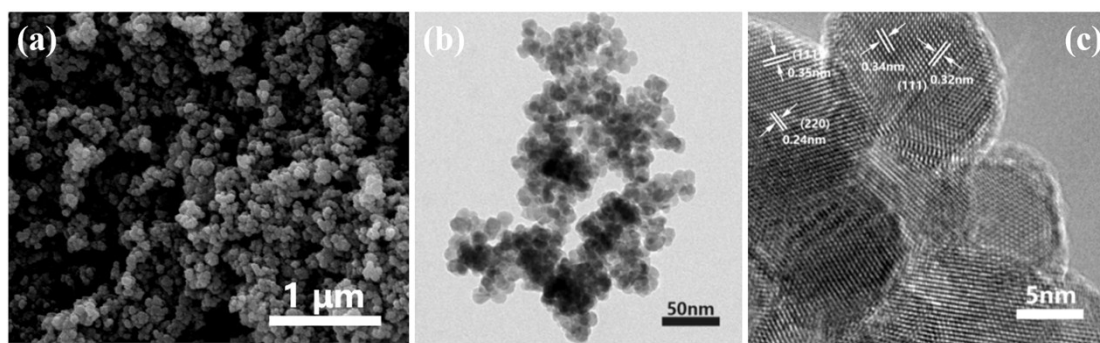

**Fig. S2** (a) SEM, (b) TEM and (c) HRTEM images of as-prepared pure CdS (CT0).

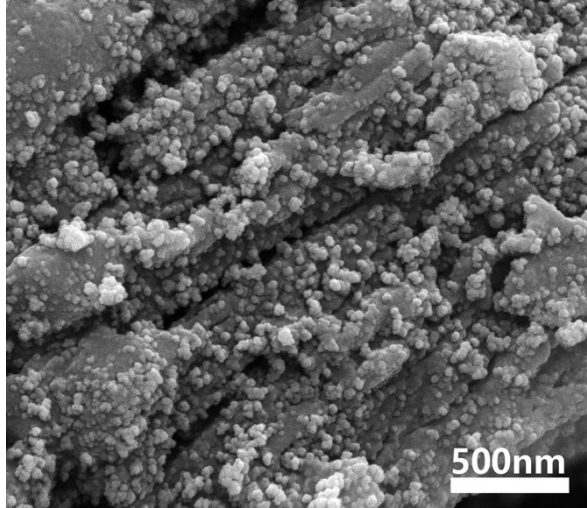

**Fig. S3** SEM image of the mixture of 1 wt.% non-plasma treated Ti<sub>3</sub>C<sub>2</sub> and 99 wt.% CdS NPs (NPCT1).

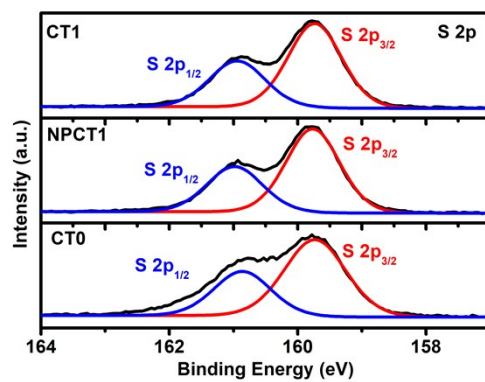

**Fig. S4** The high-resolution XPS spectra of S 2p for CT0 (CdS NPs), CT1 (CT hybrid with 1 wt.%  $\text{Ti}_3\text{C}_2\text{T}_x$ ) and NPCT1 (CT hybrid with 1 wt.%  $\text{Ti}_3\text{C}_2$ ).

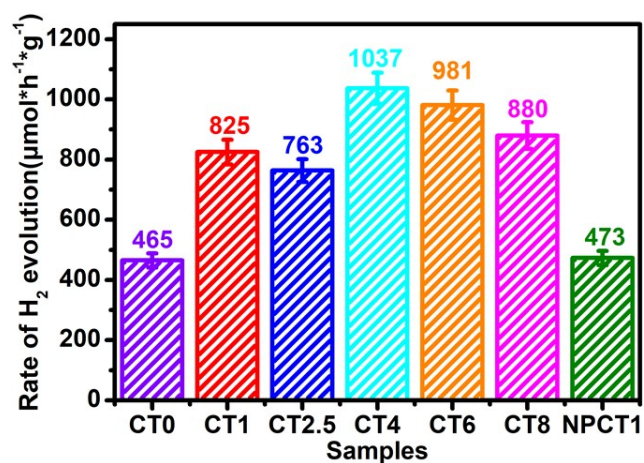

**Fig. S5** Photocatalytic H<sub>2</sub>-production of as-prepared CT<sub>x</sub> (x=0, 1, 2.5, 4, 6, 8; CT<sub>x</sub>: CT hybrids with a Ti<sub>3</sub>C<sub>2</sub>T<sub>x</sub> content of x wt.%) and NPCT1 (CT hybrid with 1 wt.% Ti<sub>3</sub>C<sub>2</sub>) under visible-light irradiation.

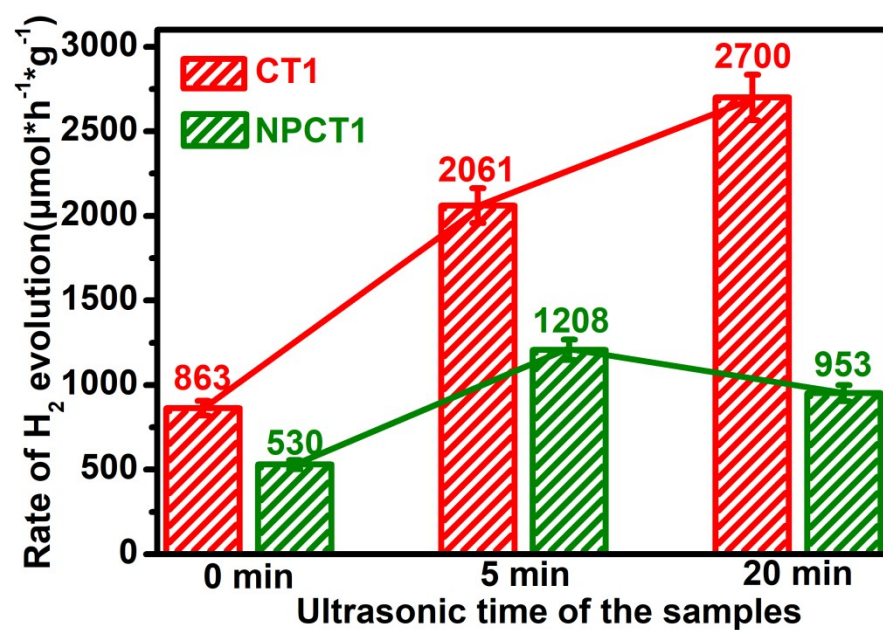

Fig. S6 After different ultrasonic pretreatment time, the H<sub>2</sub> evolution yield of CT1 and NPCT1 under visible-light irradiation.

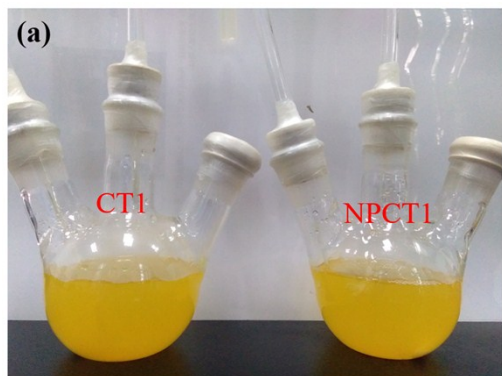

Before visible light irradiation

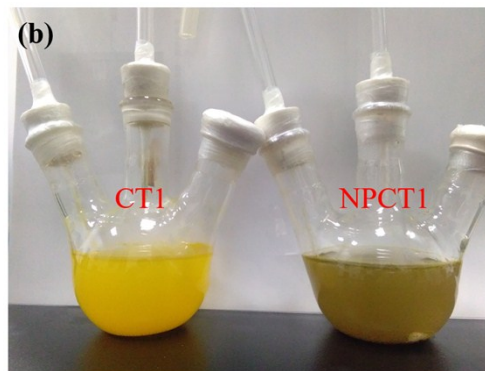

After 20 min of sonication + 3 h of visible light irradiation

**Fig. S7** CT1 and NPCT1 reaction solution before sonication and visible-light irradiation (a) and after 20 min of sonication + 3 h of visible light irradiation (b).

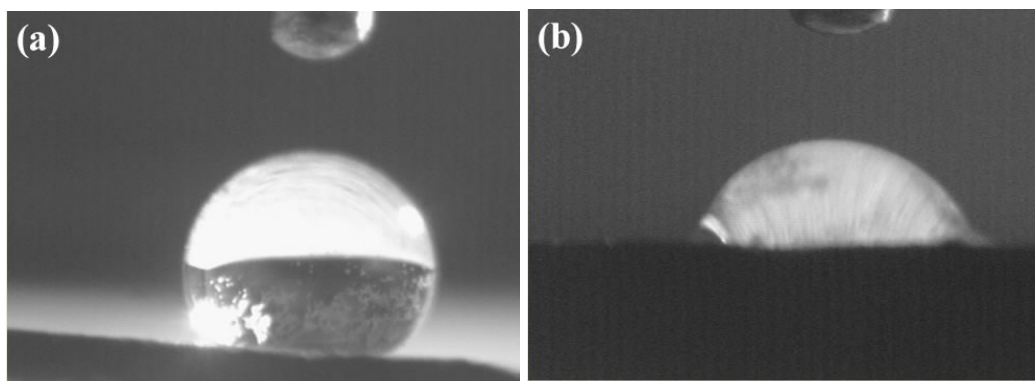

**Fig. S8** Contact angle measurements of (a) non-plasma-treated  $\text{Ti}_3\text{C}_2$  and (b) plasma-modified  $\text{Ti}_3\text{C}_2\text{T}_x$ . The static contact angle measurements show that the contact angle of plasma-modified  $\text{Ti}_3\text{C}_2\text{T}_x$  is dramatically decreased comparing with the non-plasma-treated  $\text{Ti}_3\text{C}_2$ , suggesting the hydrophilicity of plasma-modified  $\text{Ti}_3\text{C}_2\text{T}_x$  after plasma treatment.
